# Supplementary material for: Effect of Oral Administration of Polyethylene Glycol 400 on Gut Microbiota Composition and Diet-Induced Obesity in Mice
Source: MDPI journal article supplement (doi:10.3390/microorganisms11081882), 2023-07-26
Supplement: s1 [file s1]

**Table S1. Primer sequences for qPCR**

| Target gene or bacteria     | Direction | Sequence (5' to 3')      |
|-----------------------------|-----------|--------------------------|
| Rpl13a                      | Forward   | CCATTGTGGCCAAGCAGGTA     |
|                             | Reverse   | CTCGGGAGGGGTGGTATTC      |
| TNF-a                       | Forward   | TAGCCACGTCGTAGCAAAC      |
|                             | Reverse   | GCAGCCTTGTCCTTGAAGA      |
| Adiponectin                 | Forward   | GTCTGGCTCCAGGTGTATGG     |
|                             | Reverse   | AGCTGAAAGTGTGTGCGACTGT   |
| F4/80                       | Forward   | CTGGGATCCTACAGCTGCTC     |
|                             | Reverse   | AGGAGCCTGGTACATTGGTG     |
| CD11c                       | Forward   | CTGGATAGCCTTTCTTCTGCTG   |
|                             | Reverse   | GCACACTGTGTCCGA ACTCA    |
| Tjp1                        | Forward   | GCCAGAGAAAAGTTGGCAAG     |
|                             | Reverse   | TTGGATACCACTGCGCATAA     |
| Muc2                        | Forward   | GCTGACGAGTGGTTGGTGAATG   |
|                             | Reverse   | GATGAGGTGGCAGACAGGAGAC   |
| Eubacterium                 | Forward   | ACTCCTACGGGAGGCAGCAGT    |
|                             | Reverse   | ATTACCGCGGCTGCTGGC       |
| Akkermansia muciniphila     | Forward   | CAGCACGTGAAGGTGGGGAC     |
|                             | Reverse   | CCTTGCGGTTGGCTTCAGAT     |
| Parabacteroides goldsteinii | Forward   | GCAGCACGATGTAGCAATACA    |
|                             | Reverse   | TTAACAAATATTTCCATGTGGAAC |

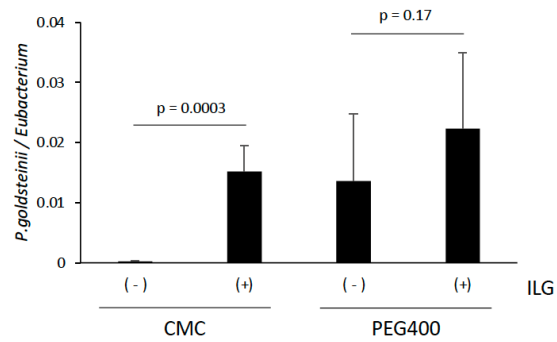

**Figure S1. Relative abundance of *P. goldsteinii* in mice administered with ILG dispersed in CMC or PEG400.** RT-PCR analysis of eubacterium and *P. goldsteinii* in fecal DNA isolated from ND-fed mice administered with CMC or PEG400 (40%) in the presence or absence of ILG ( $n = 6$ ). ILG dispersed in CMC or PEG400 was administered for two weeks post-acclimation.
